# Supplementary material
Source: PubMed Central journal article supplement (PMC5662072)
Supplement: Supp_Fig1.pdf [file Supp_Fig1.pdf]

## Supplementary Data

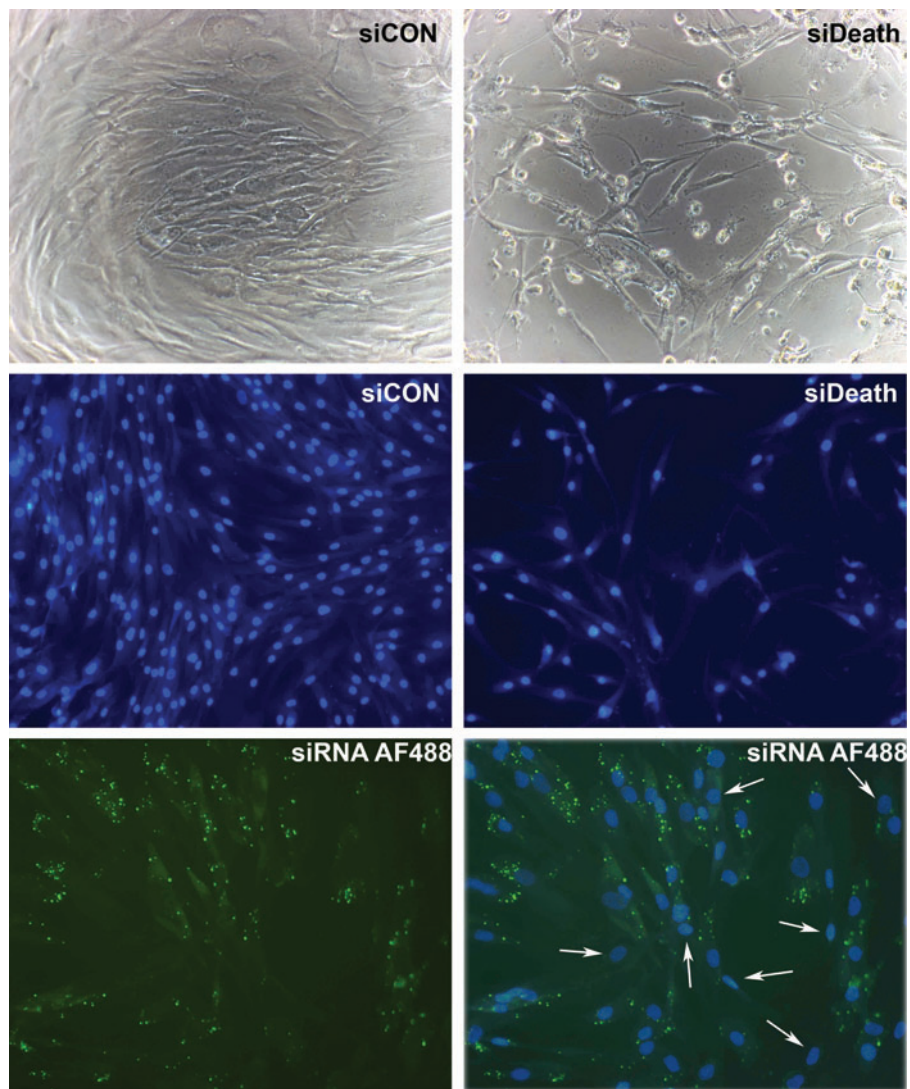

**SUPPLEMENTARY FIG. S1.** Transfection efficiency test with *siDeath* was over 90%. Cells were reverse transfected with Xtreme siRNA transfection reagent and *siDeath* or *siRNA* AF488, and images were taken at 48 h posttransfection. *Top panel:* bright field images of si; *middle panels:* cells were fixed and DAPI stained; *bottom panels:* image of cells transfected with *siRNA* AF488, which emits *green* fluorescence inside cells. *Arrows* point to a few cells (7/63) that did not appear to be fluorescent ( $n=3$ ).
