# Supplementary material
Source: PubMed Central journal article supplement (PMC5662072)
Supplement: Supp_Fig2.pdf [file Supp_Fig2.pdf]

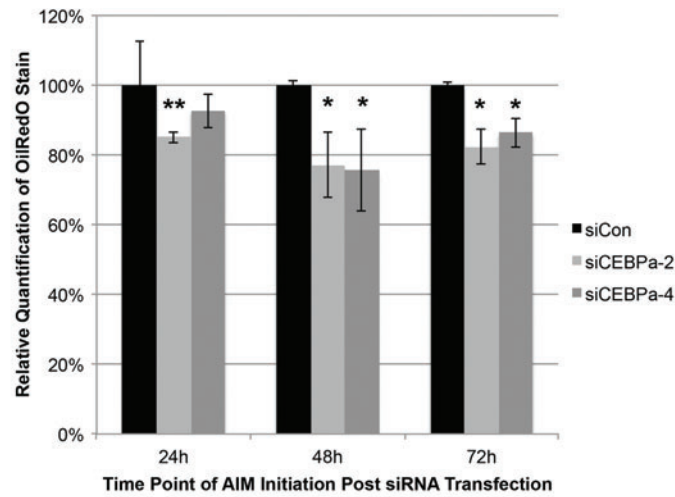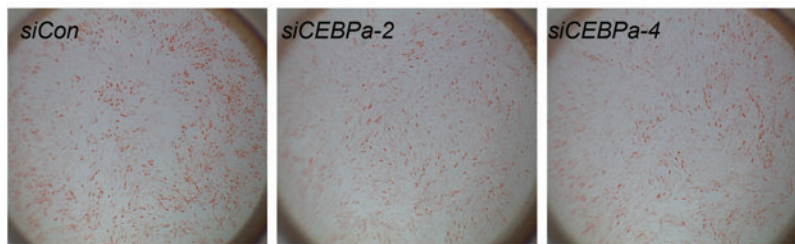

**SUPPLEMENTARY FIG. S2.** Transient downregulation of *C/EBP $\alpha$*  decreased adipogenic differentiation of hMSCs. **(A)** Equal number of cells was transfected by *siCon* or two different *siRNAs* targeting *C/EBP $\alpha$* , followed by 12-day AIM treatment initiated at 24, 48, or 72 h posttransfection, and subsequently OilRedO staining and quantification. **(B)** Representative whole well images of transfected cells that were stained with OilRedO solution at the end of AIM treatment. \* $P < 0.01$ , \*\* $P < 0.05$  ( $n = 3$ ). AIM, adipogenic inducing media; *C/EBP $\alpha$* , CCAAT/enhancer binding protein alpha; hMSCs, human mesenchymal stem cells; *siCon*, *SiControl*.
