# Supplementary material
Source: PubMed Central journal article supplement (PMC5662072)
Supplement: Supp_Fig3.pdf [file Supp_Fig3.pdf]

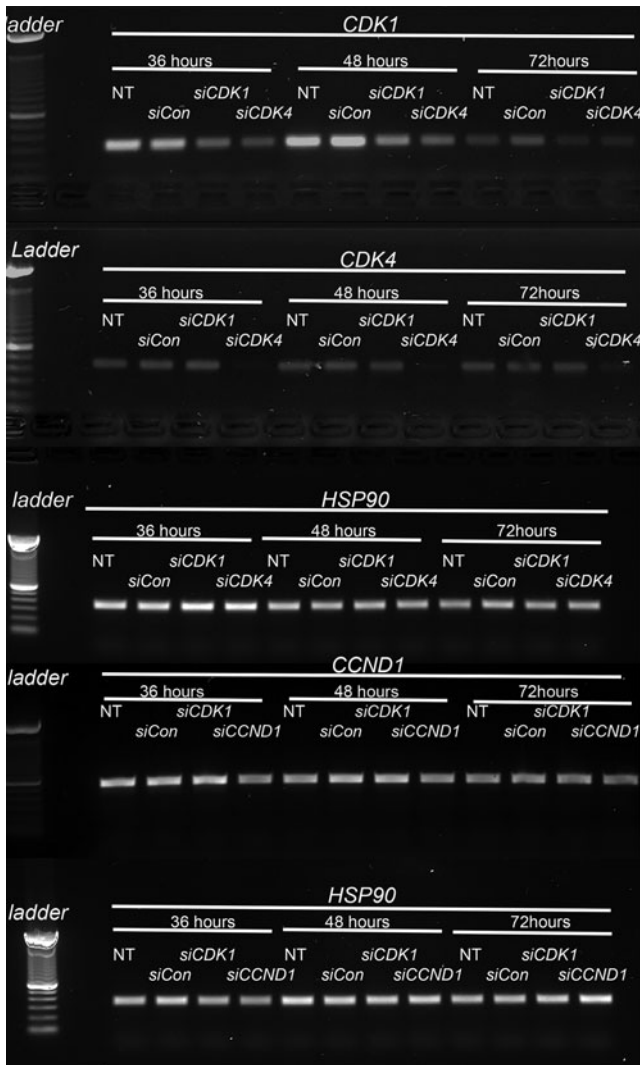

**SUPPLEMENTARY FIG. S3.** Agarose gel images of RT-PCR products for *HSP90*, *Cdk1*, *Cdk4*, and *CCND1* in *siCon*-, *siCdk1*-, *siCdk4*-, and *siCCND1*-transfected cells. Expression was examined at 36, 48, and 72 h after treatment initiation. *HSP90* products served as internal control to normalize the amount of *cDNA* templates used in PCR reaction in different treatment samples. RT-PCR, reverse transcription polymerase chain reaction.
