# Supplementary material
Source: PubMed Central journal article supplement (PMC5662072)
Supplement: Supp_Fig4.pdf [file Supp_Fig4.pdf]

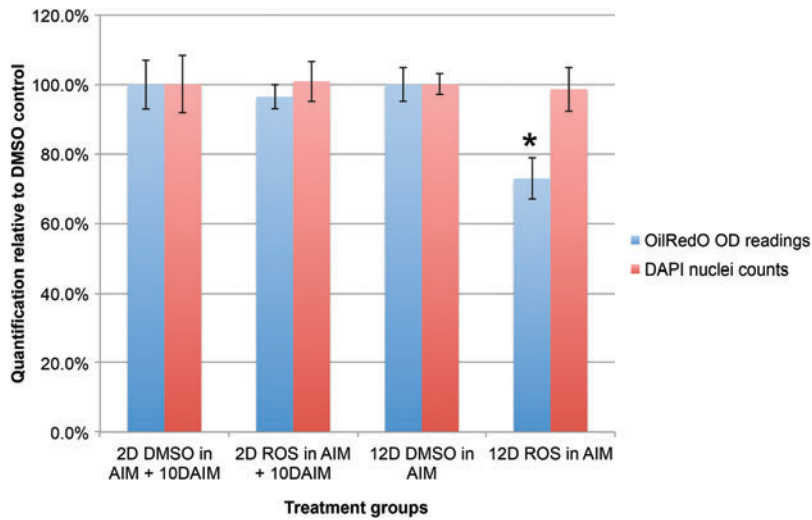

**SUPPLEMENTARY FIG. S4.** ROS inhibited adipogenesis without affecting cellular proliferation at 5  $\mu$ M. Cells were plated at equal density before AIM treatment with DMSO or ROS for 2 days (2D), followed by 10 days of AIM treatment alone (10DAIM), or AIM treatment with DMSO or ROS continuously for 12 days (12D). \* $P < 0.01$  ( $n = 3$ ). DMSO, dimethyl sulfoxide; ROS, roscovitine.
